# Supplementary material for: Increased Food Resources Help Eastern Oyster Mitigate the Negative Impacts of Coastal Acidification
Source: MDPI journal article supplement (doi:10.3390/ani13071161), 2023-03-25
Supplement: s1 [file s1]

**Table S1.** Seawater carbonate chemistry values ( $\pm$ ) SD for respiration assay

|                                                                        | <b>Ambient <math>p\text{CO}_2</math></b> | <b>Elevated <math>p\text{CO}_2</math></b> |
|------------------------------------------------------------------------|------------------------------------------|-------------------------------------------|
| <b>Temperature °C</b>                                                  | 23.49 $\pm$ 2.37                         | 23.49 $\pm$ 2.42                          |
| <b>pH<sub>r</sub></b>                                                  | 7.92 $\pm$ 0.06                          | 7.57 $\pm$ 0.02                           |
| <b><math>p\text{CO}_2</math> (<math>\mu\text{atm}</math>)</b>          | 458.44 $\pm$ 26.57                       | 1138.92 $\pm$ 269.75                      |
| <b><math>\Omega</math> Ca</b>                                          | 2.76 $\pm$ 0.74                          | 1.30 $\pm$ 0.26                           |
| <b><math>\Omega</math> Ar</b>                                          | 1.77 $\pm$ 0.47                          | 0.83 $\pm$ 0.16                           |
| <b>TCO<sub>2</sub> (<math>\mu\text{mol L}^{-1}</math>)</b>             | 1641.81 $\pm$ 349.39                     | 1741.85 $\pm$ 449.15                      |
| <b>CO<sub>3</sub><sup>2-</sup> (<math>\mu\text{mol L}^{-1}</math>)</b> | 108.47 $\pm$ 30.34                       | 51.12 $\pm$ 10.66                         |
| <b>Total Alkalinity (<math>\mu\text{mol L}^{-1}</math>)</b>            | 1789.68 $\pm$ 383.12                     | 1783.31 $\pm$ 448.90                      |
| <b>Salinity</b>                                                        | 27.33 $\pm$ 0.72                         | 27.33 $\pm$ 0.72                          |

**Table S2.** Seawater carbonate chemistry values ( $\pm$ ) SD for food limitation assay

|                                                                        | <b>Ambient <math>p\text{CO}_2</math></b> | <b>Elevated <math>p\text{CO}_2</math></b> |
|------------------------------------------------------------------------|------------------------------------------|-------------------------------------------|
| <b>Temperature °C</b>                                                  | 21.84 $\pm$ 0.06                         | 21.63 $\pm$ 0.11                          |
| <b>pH<sub>r</sub></b>                                                  | 8.14 $\pm$ 0.08                          | 7.49 $\pm$ 0.09                           |
| <b><math>p\text{CO}_2</math> (<math>\mu\text{atm}</math>)</b>          | 322.57 $\pm$ 78.74                       | 1600.23 $\pm$ 346.23                      |
| <b><math>\Omega</math> Ca</b>                                          | 5.20 $\pm$ 0.83                          | 1.28 $\pm$ 0.24                           |
| <b><math>\Omega</math> Ar</b>                                          | 3.36 $\pm$ 0.54                          | 0.83 $\pm$ 0.15                           |
| <b>TCO<sub>2</sub> (<math>\mu\text{mol L}^{-1}</math>)</b>             | 1981.30 $\pm$ 35.41                      | 2060.09 $\pm$ 44.85                       |
| <b>CO<sub>3</sub><sup>2-</sup> (<math>\mu\text{mol L}^{-1}</math>)</b> | 209.07 $\pm$ 33.58                       | 51.61 $\pm$ 9.49                          |

|                                                             |                     |                      |
|-------------------------------------------------------------|---------------------|----------------------|
| <b>Total Alkalinity (<math>\mu\text{mol L}^{-1}</math>)</b> | 2268.11 $\pm$ 67.95 | 1783.31 $\pm$ 448.90 |
| <b>Salinity</b>                                             | 30 $\pm$ 0          | 30 $\pm$ 0           |

**Table S3.** Seawater carbonate chemistry values ( $\pm$ ) SD for flow through system housing adults used in biochemical analyses and sorting assay

|                                                                          | <b>Ambient <math>p\text{CO}_2</math></b> | <b>Elevated <math>p\text{CO}_2</math></b> |
|--------------------------------------------------------------------------|------------------------------------------|-------------------------------------------|
| <b>Temperature <math>^{\circ}\text{C}</math></b>                         | 23.44 $\pm$ 3.34                         | 23.43 $\pm$ 3.21                          |
| <b>pH<sub>r</sub></b>                                                    | 7.94 $\pm$ 0.02                          | 7.30 $\pm$ 0.43                           |
| <b><math>p\text{CO}_2</math> (<math>\mu\text{atm}</math>)</b>            | 521.53 $\pm$ 48.68                       | 3061.44 $\pm$ 0.66                        |
| <b><math>\Omega</math> Ca</b>                                            | 3.45 $\pm$ 0.30                          | 1.03 $\pm$ 0.76                           |
| <b><math>\Omega</math> Ar</b>                                            | 2.23 $\pm$ 0.22                          | 0.66 $\pm$ 0.48                           |
| <b><math>\text{TCO}_2</math> (<math>\mu\text{mol L}^{-1}</math>)</b>     | 2036.10 $\pm$ 161.36                     | 2225.38 $\pm$ 374.77                      |
| <b><math>\text{CO}_3^{2-}</math> (<math>\mu\text{mol L}^{-1}</math>)</b> | 142.36 $\pm$ 18.12                       | 41.63 $\pm$ 29.87                         |
| <b>Total Alkalinity (<math>\mu\text{mol L}^{-1}</math>)</b>              | 2227.00 $\pm$ 188.47                     | 2179.65 $\pm$ 231.50                      |
| <b>Salinity</b>                                                          | 27.03 $\pm$ 2.86                         | 27.40 $\pm$ 3.39                          |
